# Supplementary material for: High Genomic Diversity and Heterogenous Origins of Pathogenic and Antibiotic-Resistant Escherichia coli in Household Settings Represent a Challenge to Reducing Transmission in Low-Income Settings
Source: PubMed Central journal article supplement (PMC6968650; doi:10.1128/msphere.00704-19), 2020-01-15
Supplement: mSphere.00704-19-sf001.pdf [file mSphere.00704-19-sf001.pdf]

# Phylogroups

- A
- B1
- B2
- Cladel
- D
- E

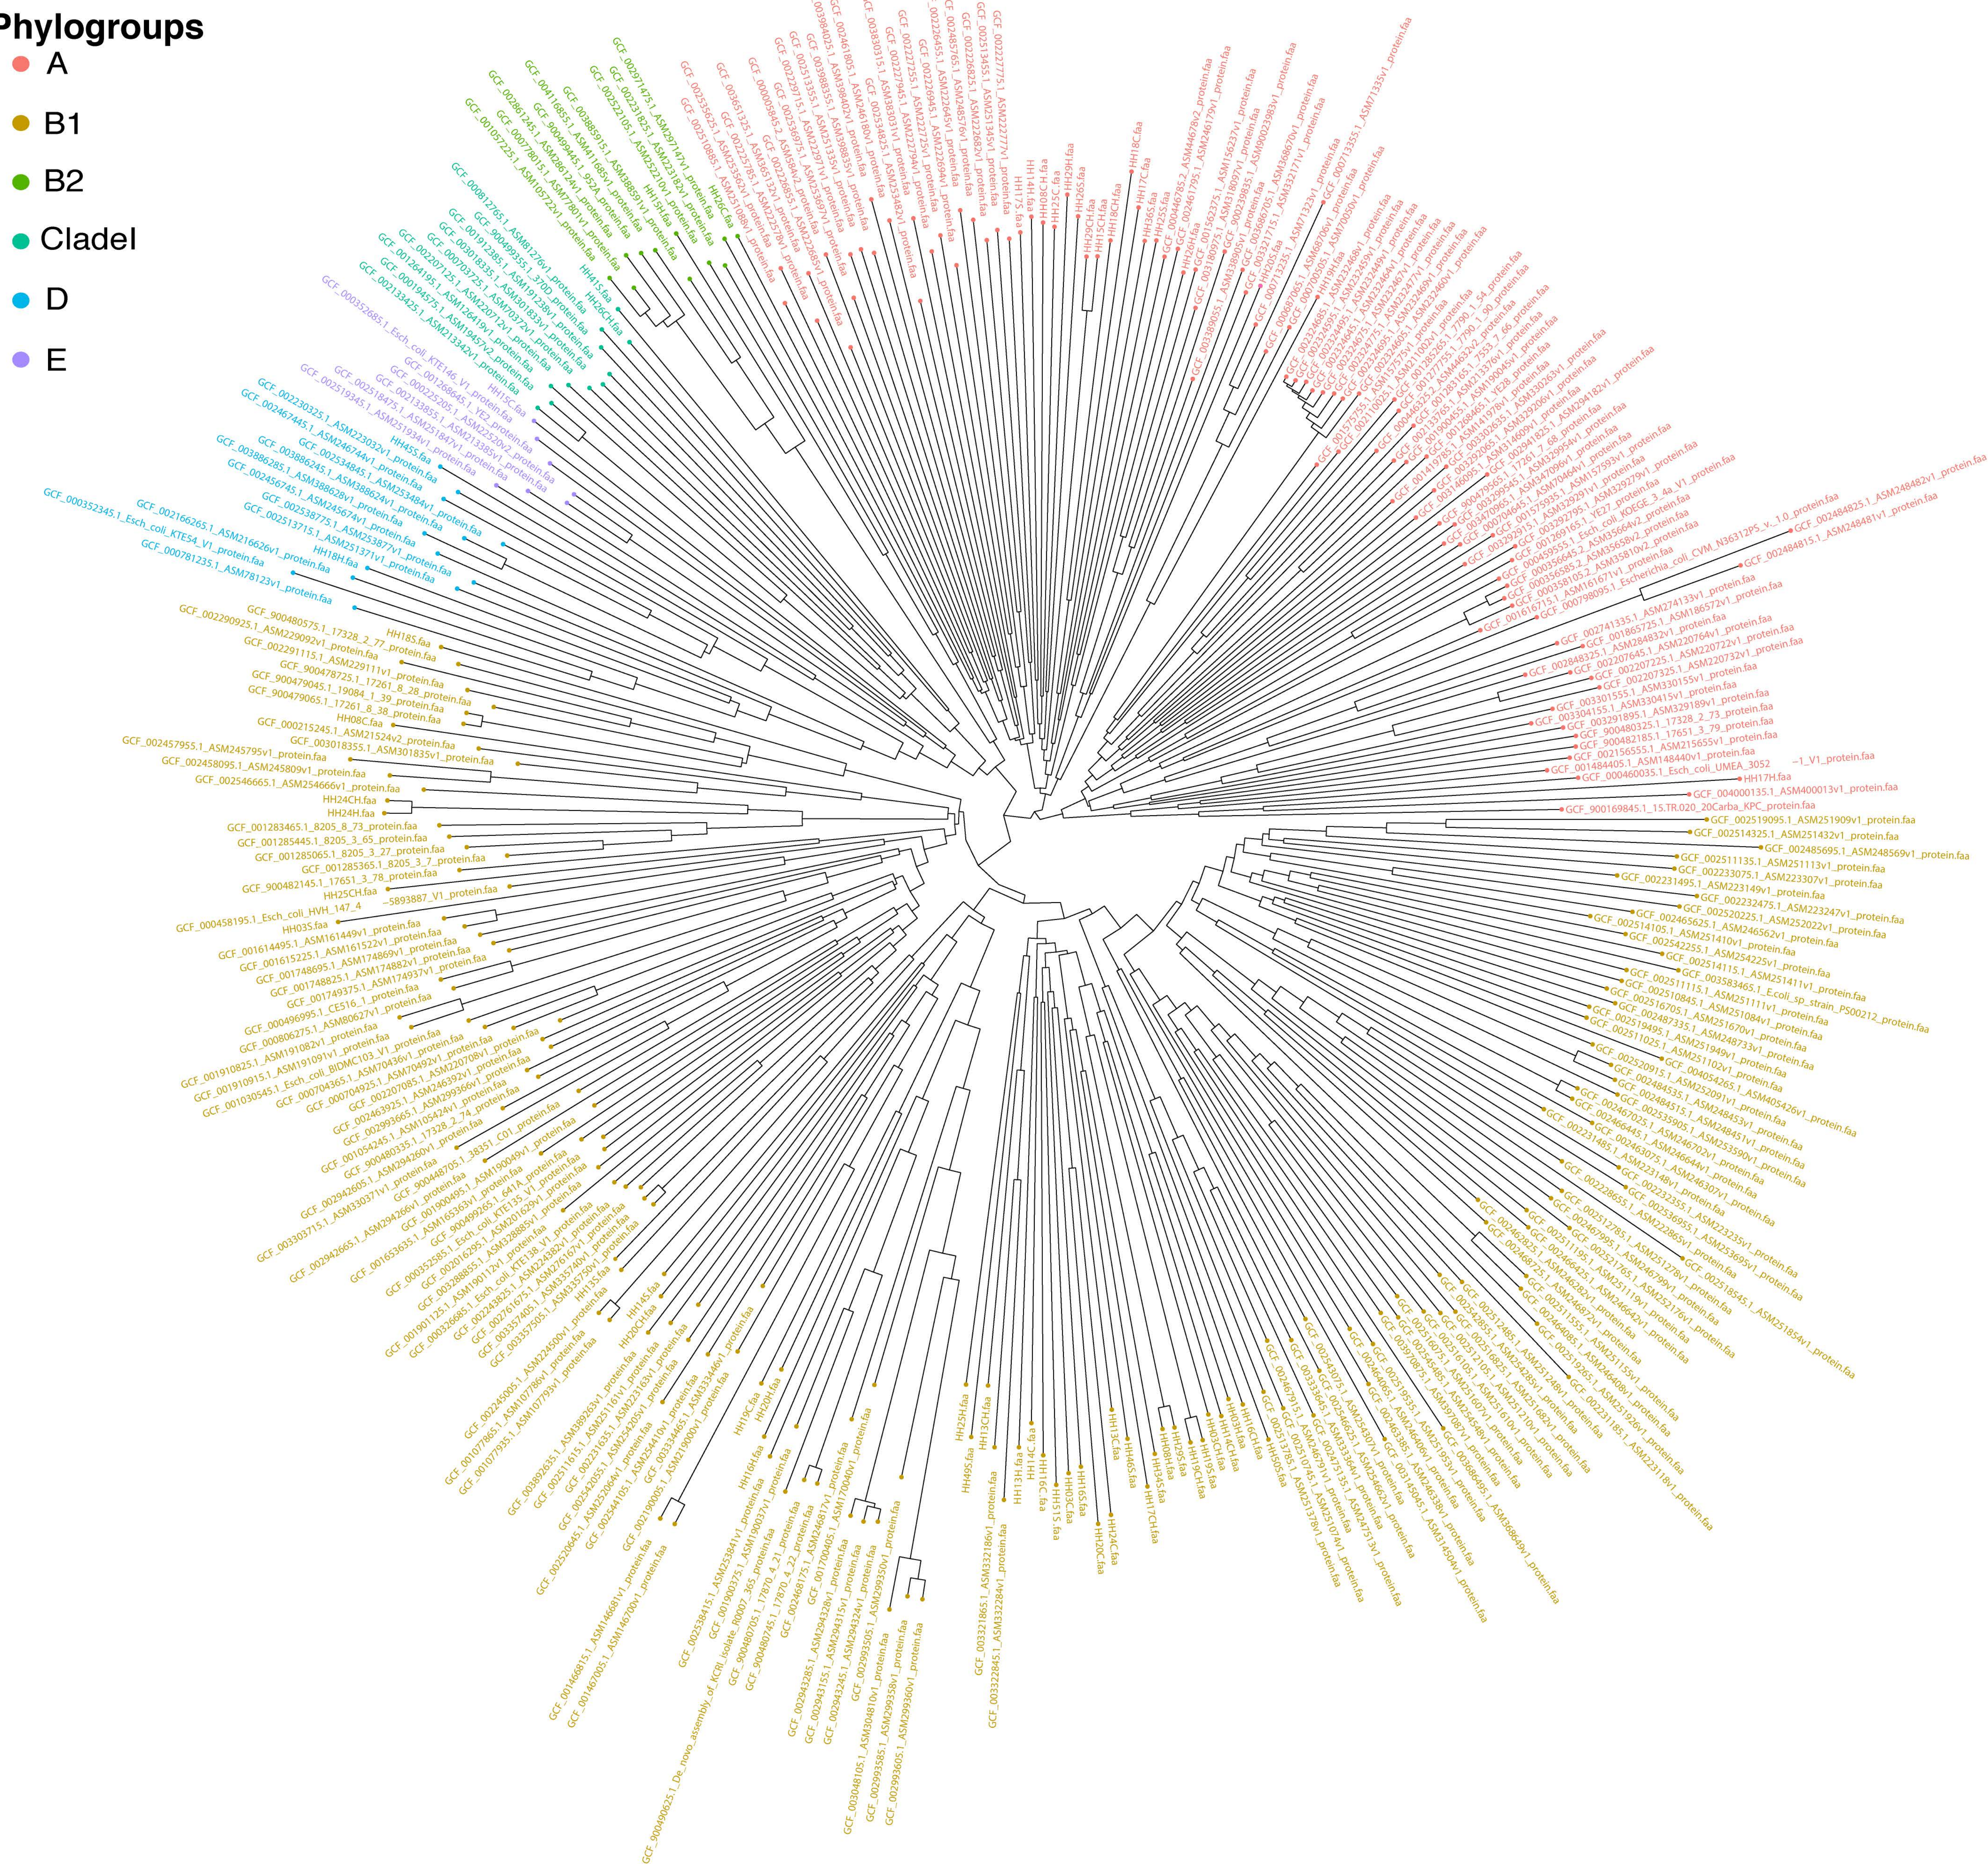

**Fig. S1.** Detailed Mash distance hierarchical dendrogram of the 60 Bangladeshi *E. coli* isolates
